# Supplementary material
Source: publisher figshare collection journal article supplement (https://asha.figshare.com/articles/dataset/_/19233516)
Supplement: Supplementary file 1 [file 1]

## Supplemental Material S1. Methodological quality rating scales.

| PEDro*                         |                                                                         | NIH Pre-Post*              |                                                                                           | SCED*            |                                                                       |
|--------------------------------|-------------------------------------------------------------------------|----------------------------|-------------------------------------------------------------------------------------------|------------------|-----------------------------------------------------------------------|
| Category                       | Item                                                                    | Category                   | Item                                                                                      | Category         | Item                                                                  |
| Eligibility                    | 1. Criteria specified (not included in score)                           | Study question             | 1. Clearly specified                                                                      | Clinical history | 1. Age, sex, etiology, and severity specified (not included in score) |
| Participants                   | 2. Random allocation                                                    | Eligibility                | 2. Criteria specified                                                                     | Target behaviors | 2. Precise and repeatable measures specified                          |
|                                | 3. Concealed allocation                                                 | Participants               | 3. Representative of clinical population of interest                                      | Design           | 3. Must be A-B-A or multiple baselines                                |
| Intervention                   | 4. Similar groups at baseline on prognostic indicators                  |                            | 4. All meeting eligibility criteria enrolled                                              |                  | 4. Sufficient baseline sampling                                       |
| Blinding                       | 5. Blinded participants                                                 | Sample size                | 5. Sufficiently large (adequate statistical power)                                        |                  | 5. Sufficient treatment phase sampling                                |
|                                | 6. Blinded therapists                                                   | Intervention               | 6. Clearly specified                                                                      |                  | 6. Raw data points reported                                           |
|                                | 7. Blinded assessors                                                    | Outcome measures           | 7. Clearly specified, valid, reliable and assessed consistently across participants       | Observer bias    | 7. Inter-rater reliability for at least target behavior measure       |
| Outcome measures               | 8. Obtained for >85% of group participants for at least one key outcome | Blinding                   | 8. Blinded assessors                                                                      | Assessors        | 8. Independence of assessors from therapists                          |
|                                | 9. Analysis by intention to treat                                       | Follow-up rate             | 9. ≤ 20% loss to follow-up after baseline and loss to follow-up accounted for in analysis | Analyses         | 9. Use of statistical analyses                                        |
|                                | 10. Between-group statistical comparison for at least one key outcome   | Statistical analysis       | 10. Use of statistical tests to assess significance of pre-post changes on outcomes       | Replication      | 10. Either across participants, therapists or settings                |
| Treatment effect & variability | 11. Point measures and measures of variability                          | Outcome measures           | 11. Multiple measurements before and after intervention                                   | Generalization   | 11. Evidence for generalization                                       |
|                                |                                                                         | Group level intervention** | 12. Individual-level outcome efforts accounted for in group level intervention            |                  |                                                                       |

\*PEDro: Physiotherapy Evidence Database scale (Maher et al., 2003); NIH Pre-Post: NIH Quality Assessment Tool for Before-After (Pre-Post) Studies with No Control Group (National Heart, Lung, and Blood Institute); SCED: Single-Case Experimental Design (Tate et al., 2008).

\*\*No studies in this review provided group level intervention. Therefore, the maximum score for any cohort study on the NIH Pre-Post assessment tool was 11.
