# Supplementary material
Source: publisher figshare collection journal article supplement (https://asha.figshare.com/articles/dataset/_/19233516)
Supplement: Supplementary file 2 [file 1]

## Supplemental Material S2. Outcome categories and exemplars.

| Outcome measure category          | Measures                                                                                                                                                                                                                    |
|-----------------------------------|-----------------------------------------------------------------------------------------------------------------------------------------------------------------------------------------------------------------------------|
| Discourse                         | Conversation turn analysis, story grammar analysis (e.g., proportion of T-units in episode structure), global coherence, exchange structure analysis, thematic units, response appropriateness                              |
| Pragmatic or social communication | Assessment Battery for Communication (ABaCo), Communication-specific Coping Scale – Research Version (CommSpeCS), Discourse Coping Scale—Clinician Rating (DCS–CR), Profile of Pragmatic Impairment in Communication (PPIC) |
| Functional communication          | La Trobe Communication Questionnaire (LCQ), Scale of Perceived Social Self-Efficacy (PSSE)                                                                                                                                  |
| Quality of life/Functioning       | Craig Handicap Assessment and Reporting Technique – Short Form (CHART-SF), Satisfaction with Life Scale (SWLS); Sydney Psychosocial Reintegration Scale-2 (SPRS-2),                                                         |
| Psychological distress            | Depression Anxiety Stress Scales-21 (DASS-21), Posttraumatic Stress Disorder Checklist - civilian version (PCL-C), Brief Symptom Inventory 18 (BSI-18)                                                                      |
| Participant goal achievement      | Goal Attainment Scale (GAS)                                                                                                                                                                                                 |
| Cognition                         | Comprehensive Trail Making Test (CTMT), Wechsler Memory Scale-III working memory subtest, Wisconsin Card Sorting Test (WCST)                                                                                                |
